# Supplementary material
Source: PubMed Central journal article supplement (PMC8053988)
Supplement: pnas.2021658118.sapp.pdf [file pnas.2021658118.sapp.pdf]

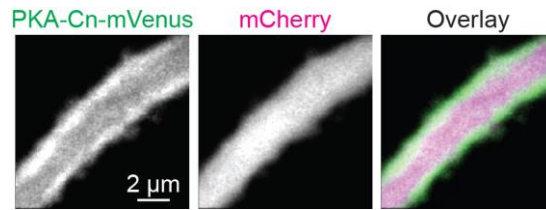

1

2 **Fig. S1.** Representative single color images and their overlay of PKA-Cn in neuronal  
3 dendrites.

4 Compared to the cytosolic marker mCherry, PKA-Cn was more enriched on the membrane.

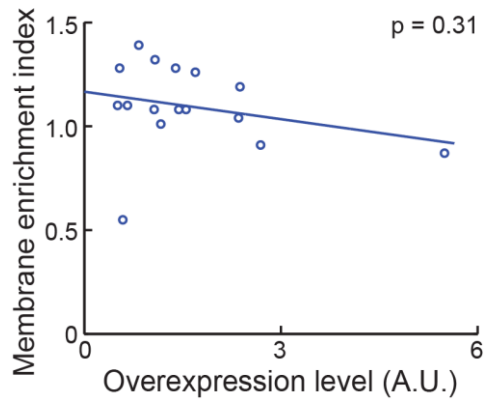

5

6 **Fig. S2.** Membrane enrichment indexes (MEI) of PKA-Cn are not dependent on the protein  
7 expression level.

8 The MEIs of PKA-Cn (same as those in Fig. 1c) did not correlate with the corresponding  
9 protein expression levels. The linear fit extrapolated to zero overexpression level at 1.17.

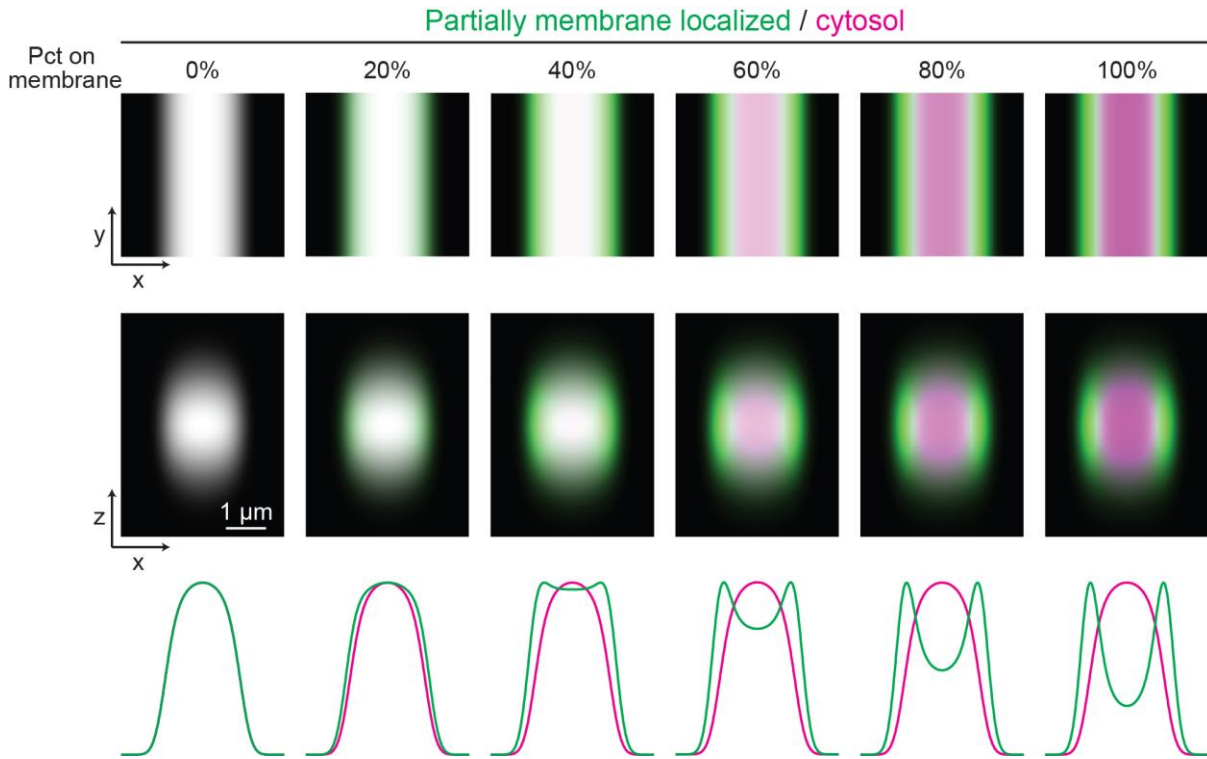

10

11 **Fig. S3.** Representative simulated images and traces of protein localization with different  
 12 fractions on the membrane.

13 Proteins (green) with indicated percentage (pct) on the membrane of a model cylindrical  
 14 neuronal dendrite ( $\phi = 2.18 \mu\text{m}$ ) along the y axis, with the remaining evenly distributed in  
 15 the cytosol, are convoluted with a Gaussian simulated point spread function (PSF) with a  
 16 lateral full-width-half-maximum (FWHM) size of  $0.505 \mu\text{m}$  and an axial size of  $1.78 \mu\text{m}$ .

17 Both the x-y view (top) and the x-z view (middle) are shown and overlaid on the image of a  
 18 fully cytosolic marker (magenta). Bottom panels show the normalized fluorescence  
 19 intensity traces along the x axis at the z center.

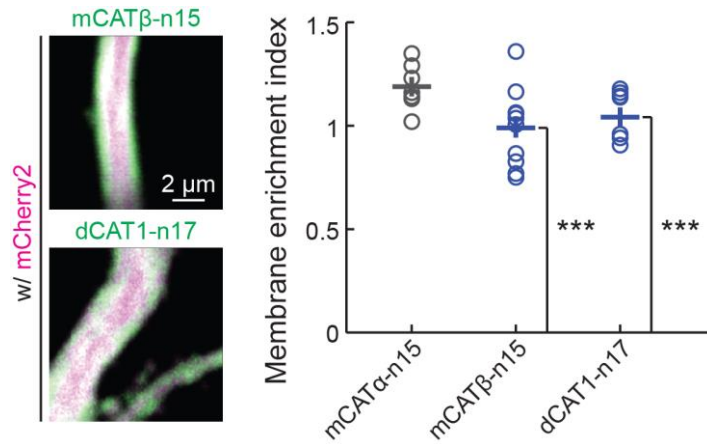

20

21 **Fig. S4.** The membrane affinity is evolutionally conserved across species and PKA-C  
 22 isoforms.

23 Representative images (left) and the membrane enrichment indexes of the first 15 residues  
 24 of mouse PKA-C α subunit (mCATα-n15, same as PKA-Cn15 in Fig. 1C), the first 15 residues  
 25 of mouse PKA-C β subunit (mCATβ-n15), and the first 17 residues of *Drosophila* PKA-C  
 26 CAT1 subunit (dCAT1-n17). See Fig. 1A for the exact sequences. n = 10 for mCATβ-n15, and  
 27 8 for dCAT1-n17.

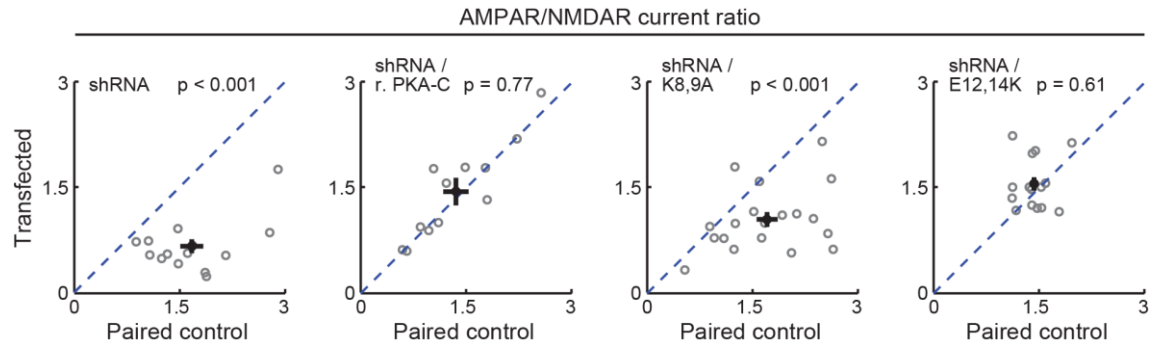

28

29 **Fig. S5.** AMPA/NMDA receptor current ratio.

30 Scatter plots of paired AMPA receptor to NMDA receptor current ratios from neighboring  
 31 untransfected CA1 neurons paired with those transfected with shRNA against PKA-C and  
 32 the indicated shRNA-resistant rescuing constructs. Statistical p values were tested using a  
 33 sign test (MATLAB). From left to right, n = 12, 14, 19, and 15.
